# Supplementary material for: An asymmetric binuclear zinc(ii) complex with mixed iminodiacetate and phenanthroline ligands: synthesis, characterization, structural conversion and anticancer properties
Source: Royal Society of Chemistry journal article supplement (doi:10.1039/c6qi00072j), 2016-01-01
Supplement: c6qi00072j1.pdf [file c6qi00072j1.pdf]

## Supporting Information

### Synthesis, Characterization, and Anticancer Properties of An Asymmetric Binuclear Zinc(II) Complex with Mixed Iminodiacetate and Phenanthroline Ligands

Lubin Ni,<sup>‡a</sup> Juan Wang,<sup>‡b</sup> Chang Liu,<sup>b</sup> Jinhong Fan,<sup>b</sup> Yun Sun,<sup>\*b</sup> Zhaohui Zhou,<sup>\*c</sup> Guowang Diao,<sup>\*a</sup>

<sup>a</sup>College of Chemistry and Chemical Engineering, Yangzhou University, Yangzhou 225002, Jiangsu, People's Republic of China.

<sup>b</sup>College of Medicine, Yangzhou University, Yangzhou 225001, People's Republic of China.

<sup>c</sup> State Key Laboratory for Physical Chemistry of Solid Surfaces, College of Chemistry and Chemical Engineering, Xiamen University, Xiamen 361005, People's Republic of China.

<sup>‡</sup>These authors contributed equally.

#### Contents

|                                                                                                                                                       |     |
|-------------------------------------------------------------------------------------------------------------------------------------------------------|-----|
| <b>Table S1.</b> Crystallographic data and structural refinements for complex (1).                                                                    | S2  |
| <b>Table S2.</b> Selected bond distances for (1).                                                                                                     | S3  |
| <b>Table S3.</b> Comparisons of Zn–O and Zn–N bond distances (Å) in iminodiacetato zinc complexes                                                     | S4  |
| <b>Table S4.</b> Hydrogen bonds for (H <sub>2</sub> O) <sub>10</sub> in (1).                                                                          | S4  |
| <b>Figure S1.</b> Crystal packing of complex (1) by hydrogen-bond and $\pi$ - $\pi$ interaction                                                       | S5  |
| <b>Figure S2.</b> X-ray powder diffraction patterns of bulk (1) and the sample calcined at different temperatures, and the calculated pattern of (1). | S5  |
| <b>Figure S3.</b> Thermogravimetric curves of (1) .                                                                                                   | S6  |
| <b>Figure S4.</b> Solid state FT-IR spectra of (1).                                                                                                   | S6  |
| <b>Table S5.</b> Absorption data in aqueous solution (molar absorption coefficient) for complex (1) and free phen ligand.                             | S7  |
| <b>Figure S5.</b> <sup>1</sup> H NMR spectrum of complex (1) in D <sub>2</sub> O solution.                                                            | S7  |
| <b>Figure S6.</b> <sup>13</sup> C NMR spectra of the solutions of free iminodiacetate ligand at various pH values.                                    | S8  |
| <b>Figure S7.</b> The time-resolved UV-vis absorption spectra of complex (1) in PBS buffer at room temperature                                        | S8  |
| <b>Table S6.</b> Hematological parameters in mice treated with (1) after 14 days.                                                                     | S9  |
| <b>Figure S8.</b> Zinc ion affects the proliferation of hepatoma cell lines.                                                                          | S10 |
| <b>Table S7.</b> The comparison of anti-proliferation activity between complex (1) and the marketed platinum-based drugs on hepatoma cells.           | S10 |
| <b>Table S8.</b> The comparison of acute toxicity between complex (1) and the marketed platinum-based drugs on mice.                                  | S11 |

**Table S1.** Crystallographic data and structural refinements for **[Zn<sub>2</sub>(ida)(phen)<sub>3</sub>(NO<sub>3</sub>)]·NO<sub>3</sub>·5H<sub>2</sub>O (1).**

|                                                                                      |                                                                                |
|--------------------------------------------------------------------------------------|--------------------------------------------------------------------------------|
| empirical formula                                                                    | C <sub>40</sub> H <sub>39</sub> Zn <sub>2</sub> N <sub>9</sub> O <sub>15</sub> |
| Formula weight                                                                       | 1016.54                                                                        |
| crystal color                                                                        | colorless                                                                      |
| crystal system                                                                       | monoclinic                                                                     |
| Unit cell dimensions                                                                 |                                                                                |
| <i>a</i> (Å)                                                                         | 12.5947(2)                                                                     |
| <i>b</i> (Å)                                                                         | 15.1874(3)                                                                     |
| <i>c</i> (Å)                                                                         | 21.5308(4)                                                                     |
| $\alpha$ (°)                                                                         |                                                                                |
| $\beta$ (°)                                                                          | 92.498(2)                                                                      |
| $\gamma$ (°)                                                                         |                                                                                |
| <i>V</i> (Å <sup>3</sup> )                                                           | 4114.51(13)                                                                    |
| space group                                                                          | <i>P</i> 2 <sub>1</sub> / <i>C</i>                                             |
| formula units                                                                        | 4                                                                              |
| <i>D</i> <sub>calc</sub> (g · cm <sup>-3</sup> )                                     | 1.641                                                                          |
| $\mu$ (mm <sup>-1</sup> )                                                            | 1.251                                                                          |
| <i>F</i> <sub>000</sub>                                                              | 2088                                                                           |
| Diffraction/radiation                                                                | Oxford CCD/Mo K $\alpha$                                                       |
| temperature (K)                                                                      | 173(2)                                                                         |
| reflections/collected/unique/ <i>R</i> <sub>int</sub>                                | 30755/13581/ 0.0441                                                            |
| crystal size (mm)                                                                    | 0.42 x 0.40 x 0.18                                                             |
| data/restraints/parameters                                                           | 13581/15/625                                                                   |
| $\theta$ range (°)                                                                   | 2.544 to 26.373                                                                |
| GOF on <i>F</i> <sup>2</sup>                                                         | 0.946                                                                          |
| <i>R</i> <sub>1</sub> , <i>wR</i> <sub>2</sub> [ <i>I</i> > 2 $\sigma$ ( <i>I</i> )] | 0.0320, 0.060                                                                  |
| <i>R</i> <sub>1</sub> , <i>wR</i> <sub>2</sub> (all data)                            | 0.0538, 0.0631                                                                 |
| largest diff. peak and hole (e Å <sup>-3</sup> )                                     | 0.538, -0.400                                                                  |

[a]  $R_1 = \sum(F_o - F_c)/\sum F_o$ ; [b]  $wR_2 = \{\sum w(F_o^2 - F_c^2)^2/\sum w(F_o^2)^2\}^{1/2}$

**Table S2.** Selected bond lengths (Å) and angles (°) for (1).

| [Zn <sub>2</sub> (ida)(phen) <sub>3</sub> (NO <sub>3</sub> )]·NO <sub>3</sub> ·5H <sub>2</sub> O (1) |            |                 |            |
|------------------------------------------------------------------------------------------------------|------------|-----------------|------------|
| Zn(1)–O(3)                                                                                           | 2.3138(14) | Zn(2)–O(1)      | 2.0401(15) |
| Zn(1)–O(4)                                                                                           | 2.2102(15) | Zn(2)–O(3)      | 2.1667(15) |
| Zn(1)–N(2)                                                                                           | 2.0855(18) | Zn(2)–O(6)      | 2.2060(15) |
| Zn(1)–N(6)                                                                                           | 2.0897(18) | Zn(2)–N(4)      | 2.1126(18) |
| Zn(1)–N(3)                                                                                           | 2.1219(18) | Zn(2)–N(1)      | 2.1276(17) |
| Zn(1)–N(7)                                                                                           | 2.1344(18) | Zn(2)–N(5)      | 2.1362(18) |
|                                                                                                      |            |                 |            |
| O(4)–Zn(1)–O(3)                                                                                      | 57.85(5)   | O(1)–Zn(2)–O(3) | 91.50(6)   |
| N(3)–Zn(1)–O(3)                                                                                      | 95.97(6)   | O(1)–Zn(2)–O(6) | 90.69(6)   |
| N(2)–Zn(1)–O(3)                                                                                      | 91.78(6)   | O(1)–Zn(2)–N(1) | 82.44(6)   |
| N(7)–Zn(1)–O(3)                                                                                      | 86.23(6)   | O(1)–Zn(2)–N(4) | 92.35(6)   |
| N(6)–Zn(1)–O(3)                                                                                      | 152.05(6)  | O(1)–Zn(2)–N(5) | 170.27(6)  |
| N(3)–Zn(1)–O(4)                                                                                      | 87.60(6)   | O(3)–Zn(2)–O(6) | 177.78(6)  |
| N(2)–Zn(1)–O(4)                                                                                      | 145.56(6)  | N(1)–Zn(2)–O(3) | 79.78(6)   |
| N(7)–Zn(1)–O(4)                                                                                      | 93.01(6)   | N(4)–Zn(2)–O(3) | 96.79(6)   |
| N(6)–Zn(1)–O(4)                                                                                      | 98.89(6)   | N(5)–Zn(2)–O(3) | 85.51(6)   |
| N(4)–Zn(2)–N(5)                                                                                      | 78.84(7)   | N(1)–Zn(2)–O(6) | 100.11(6)  |
| N(3)–Zn(1)–N(7)                                                                                      | 177.69(7)  | N(4)–Zn(2)–O(6) | 83.52(6)   |
| N(6)–Zn(1)–N(3)                                                                                      | 98.41(7)   | N(5)–Zn(2)–O(6) | 92.40(7)   |
| N(2)–Zn(1)–N(7)                                                                                      | 101.38(7)  | N(4)–Zn(2)–N(1) | 173.65(7)  |
| N(2)–Zn(1)–N(6)                                                                                      | 114.36(7)  | N(1)–Zn(2)–N(5) | 106.07(7)  |
| N(2)–Zn(1)–N(3)                                                                                      | 79.28(7)   | N(4)–Zn(2)–N(5) | 78.84(7)   |

**Table S3.** Comparisons of Zn–O and Zn–N bond distances (Å) in iminodiacetato zinc complexes (adenine = Hade, imidazole = im).

| CN | Complexes                                                                                                    | Zn–N                         | Zn–O <sub>carboxy</sub>      | Ref.             |
|----|--------------------------------------------------------------------------------------------------------------|------------------------------|------------------------------|------------------|
| 6  | [Zn <sub>2</sub> (ida)(phen) <sub>3</sub> (NO <sub>3</sub> )]·NO <sub>3</sub> ·5H <sub>2</sub> O. <b>(1)</b> | 2.0863(15)–2.1371(15)        | 2.0406(13)–2.3139(12)        | <b>This work</b> |
|    | [Zn(ida)(phen)(H <sub>2</sub> O)]·2H <sub>2</sub> O                                                          | 2.132(2), 2.091(2), 2.153(2) | 2.187(2), 2.070(2)           | [15]             |
|    | [Zn(ida)(H <sub>2</sub> O) <sub>2</sub> ] <sub>n</sub>                                                       | 2.114(2)                     | 2.010(2), 2.092(2), 2.251(2) | [15]             |
|    | La[Zn(Hida)(ida) <sub>2</sub> ]·½H <sub>2</sub> O                                                            | 2.137(3)                     | 2.092(3), 2.126(3)           | [21a]            |
|    | [Zn(ida)(Hade)(H <sub>2</sub> O) <sub>2</sub> ]                                                              | 2.167(2)                     | 2.112(2), 2.125(2)           | [21b]            |
|    | [Zn(ida)(CH <sub>2</sub> im <sub>2</sub> )]·H <sub>2</sub> O                                                 | 2.080(3)–2.177(3)            | 2.106(2)–2.209(3)            | [21c]            |
| 4  | (NH <sub>4</sub> ) <sub>n</sub> [Zn(Hida)Cl <sub>2</sub> ] <sub>n</sub>                                      | –                            | 1.989(1), 1.966(1)           | [15]             |
|    | [Zn(Hida)] <sub>n</sub> ·4H <sub>2</sub> O                                                                   | –                            | 1.963(2), 1.973(2)           | [15]             |

**Table S4.** Hydrogen bonds (Å and °) in **(1)**.

| D–H···A               | D–H   | H···A | D···A    | ∠ DHA |
|-----------------------|-------|-------|----------|-------|
| O(1w)–H(1w1)···O(2w)  | 0.871 | 1.858 | 2.679(3) | 156   |
| O(1w)–H(2w1)···O(4)   | 0.856 | 1.959 | 2.803(2) | 170   |
| O(2w)–H(2w2)···O(1wa) | 0.854 | 2.122 | 2.928(3) | 157   |
| O(2w)–H(2w1)···O(4wb) | 0.862 | 1.876 | 2.737(2) | 177   |
| O(3w)–H(3w1)···O(8d)  | 0.845 | 2.057 | 2.849(3) | 156   |
| O(4w)–H(4w2)···O(3wc) | 0.840 | 2.014 | 2.852(2) | 176   |
| O(4w)–H(4w1)···O(2)   | 0.835 | 1.971 | 2.802(2) | 173   |
| O(5w)–H(5w2)···O(1wa) | 0.868 | 1.963 | 2.796(3) | 161   |
| N(1)–H(1C)···O(5w)    | 1.00  | 2.06  | 2.934(3) | 144.4 |
| C(38)–H(38A)···O(1)   | 0.95  | 2.71  | 3.547(3) | 147.0 |
| C(21)–H(21A)···O(4e)  | 0.95  | 2.35  | 3.232(2) | 153.9 |

Symmetry codes : *a*, 1-*x*, 1-*y*, 1-*z*; *b*, -*x*, 1-*y*, 1-*z*; *c*, -*x*, -1/2+*y*, 1/2-*z*; *d*, *x*, 1+*y*, *z*; *e*, *x*, 1/2-*y*, -1/2+*z*.

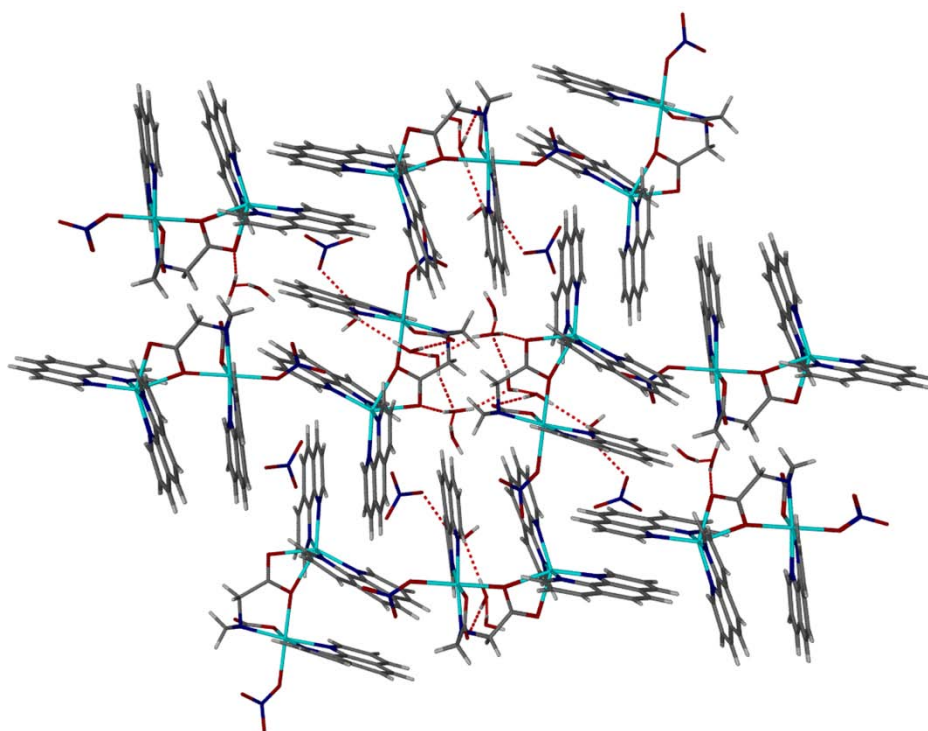

**Figure S1.** Crystal packing of complex (1) by hydrogen-bond and  $\pi$ - $\pi$ interaction.

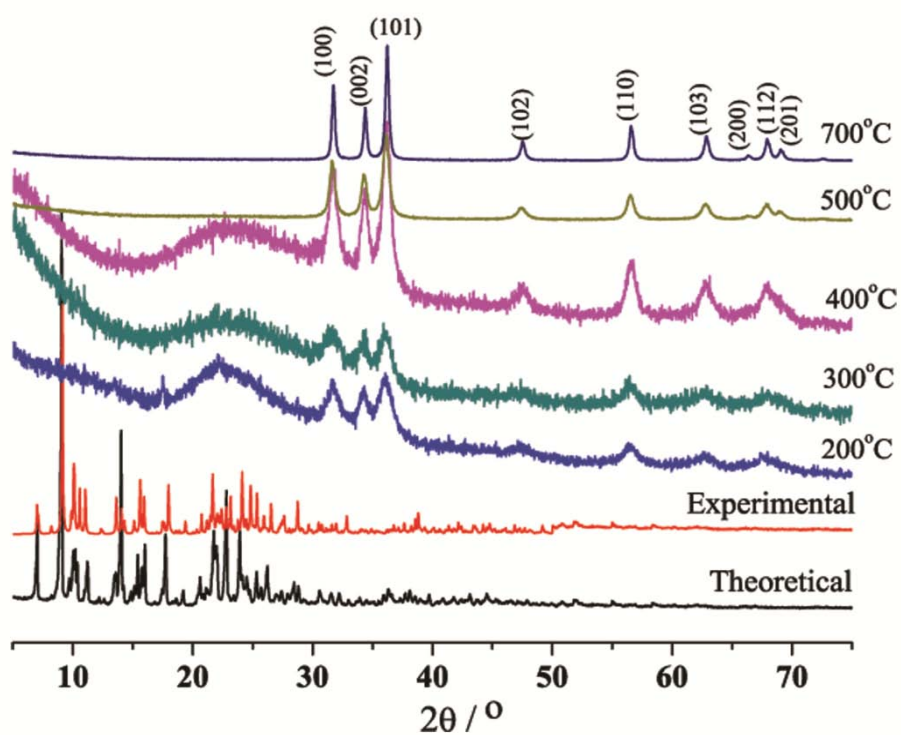

**Figure S2.** X-ray powder diffraction patterns of bulk (1) and the sample calcined at different temperatures, and the calculated pattern of (1).

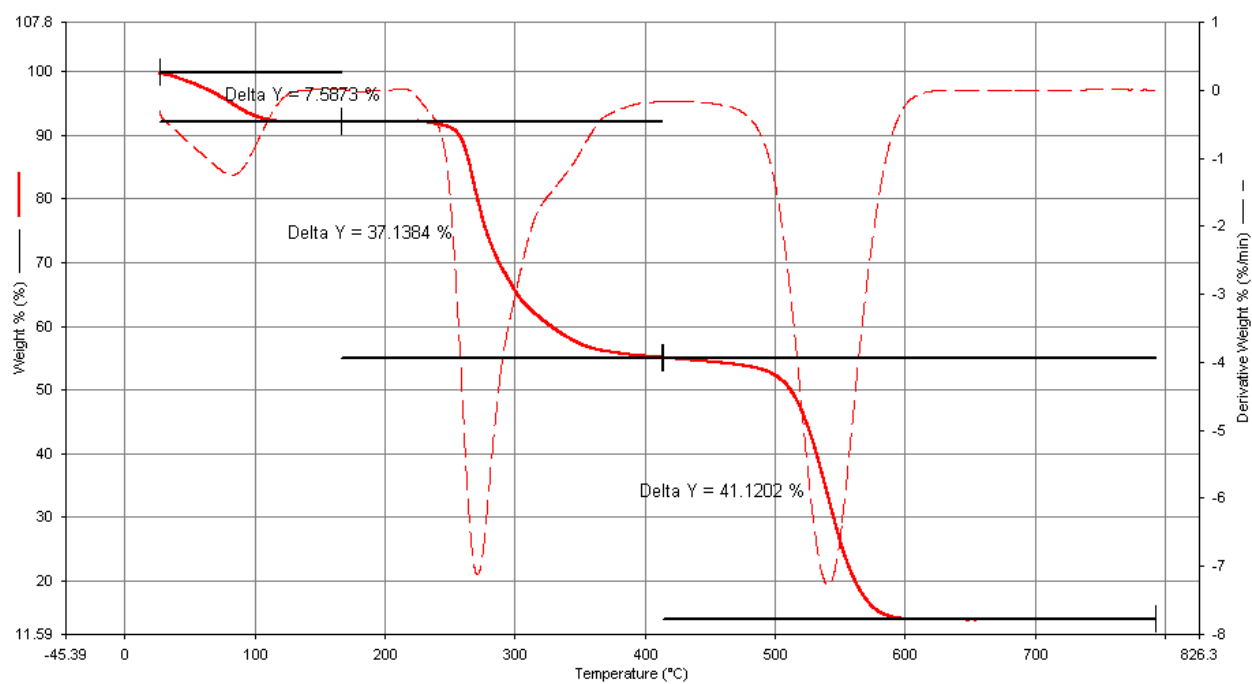

**Figure S3.** Thermogravimetric curves of complex **(1)** in flowing air atmosphere with a purge rate of 20°C/minute.

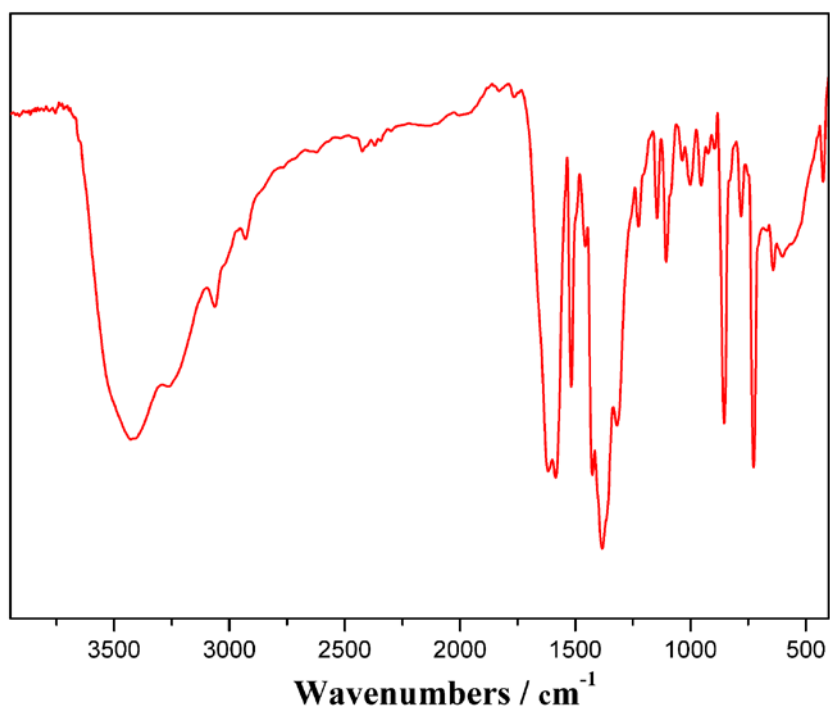

**Figure S4.** FT-IR spectra of **(1)** (recorded on KBr discs).

**Table S5.** Absorption data in aqueous solution (molar absorption coefficient) for complex (**1**) and free phen ligand.

| Molecules                                                                                                     | $\lambda_{\max}^{\text{abs}}$ nm ( L. mol <sup>-1</sup> .cm <sup>-1</sup> ) |                             |                            |
|---------------------------------------------------------------------------------------------------------------|-----------------------------------------------------------------------------|-----------------------------|----------------------------|
| [Zn <sub>2</sub> (ida)(phen) <sub>3</sub> (NO <sub>3</sub> )]·NO <sub>3</sub> ·5H <sub>2</sub> O ( <b>1</b> ) | 226 (1.59×10 <sup>5</sup> )                                                 | 268 (1.33×10 <sup>5</sup> ) | 290 (4.1×10 <sup>4</sup> ) |
| 1, 10-phen                                                                                                    | 225 (7.6×10 <sup>4</sup> )                                                  | 262 (5.4×10 <sup>4</sup> )  | —                          |

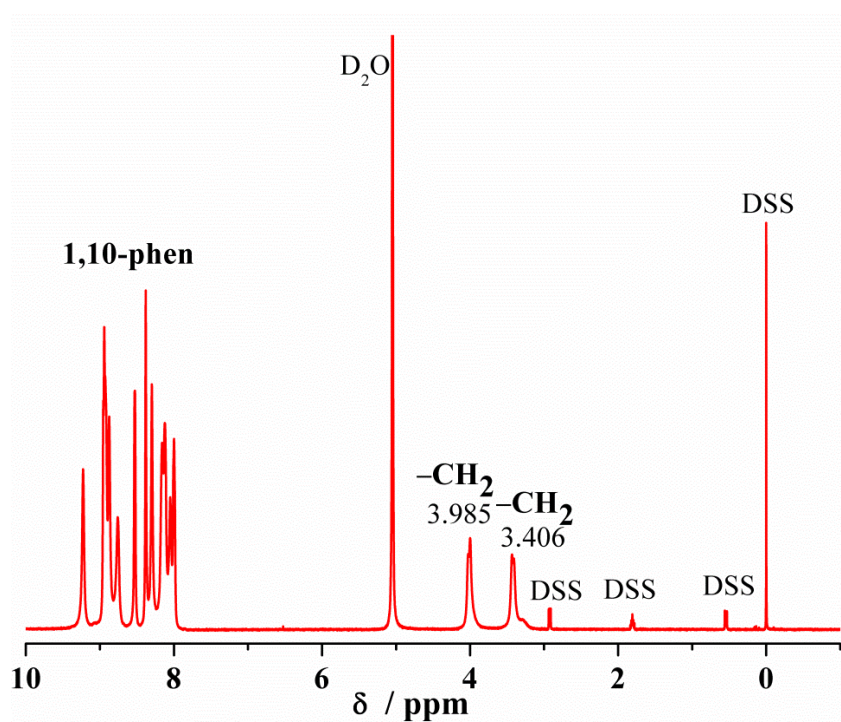

**Figure S5.** <sup>1</sup>H NMR spectrum of complex (**1**) in D<sub>2</sub>O solution.

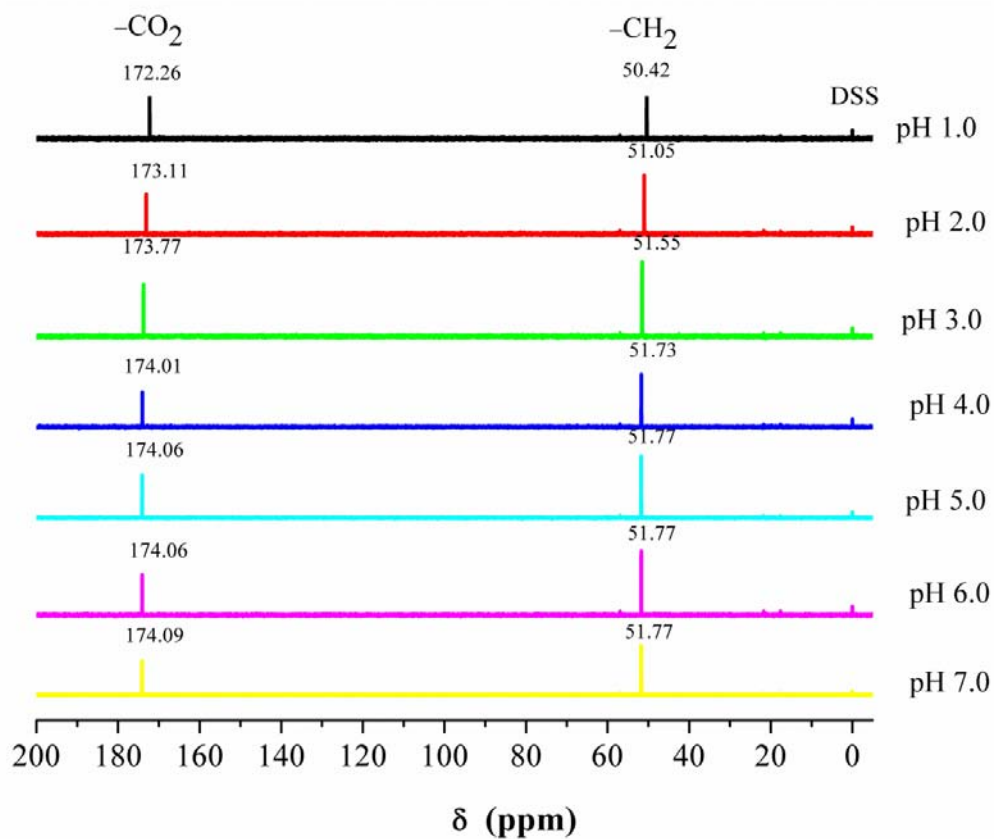

**Figure S6.**  $^{13}\text{C}$  NMR spectra of the solutions of free iminodiacetate ligand at various pH values.

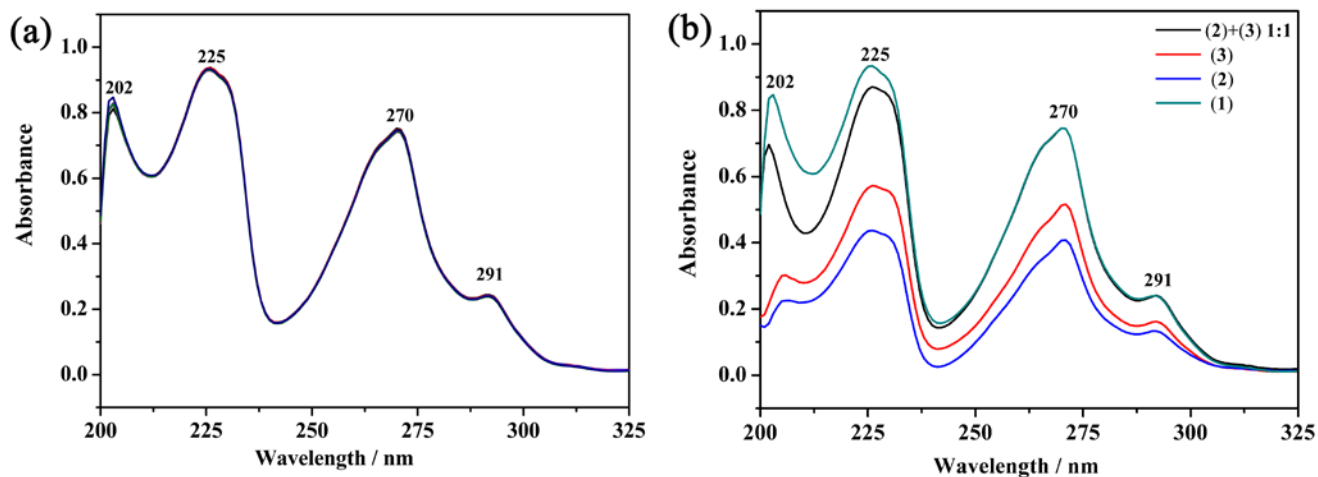

**Figure S7.** (a) UV-vis spectra of complex (1) recorded in PBS buffer at room temperature over 2 h with 2 min intervals. (b) UV-vis spectra of complex (1)-(3) ( $C = 0.01\text{mM}$ ), mixed species (2) and (3) (1:1 molar ratio,  $C = 0.01\text{mM}$ ) in PBS buffer at room temperature.



**Table S6.** Hematological parameters in mice treated with (1) at a dose of 474 mg/kg or 632 mg/kg after 14 days.

|                                       | Experiment groups |                |                          |                          |
|---------------------------------------|-------------------|----------------|--------------------------|--------------------------|
|                                       | Male              | Normal (n = 5) | (1)<br>(474mg/kg, n = 5) | (1)<br>(632mg/kg, n = 3) |
| <b>RBC</b> ( $10^{12} \cdot L^{-1}$ ) |                   | 11.3±0.45      | 11.0±0.66                | 11.0±0.52                |
| <b>Hb</b> (g/L)                       |                   | 159.8±7.19     | 159.2±7.36**             | 157.0±6.93*              |
| <b>HCT</b> (%)                        |                   | 68.6±0.82      | 68.7±3.03                | 69.6±1.48                |
| <b>MCV</b> (fL)                       |                   | 62.0±0.82      | 61.7±1.60                | 59.5±0.79                |
| <b>MCH</b> (Pg)                       |                   | 14.1±0.23      | 14.1±0.42                | 13.8±0.00                |
| <b>MCHC</b> (g/L)                     |                   | 228.4±5.86     | 228.4±1.51               | 226.5±2.12               |
| <b>RDW</b> (%)                        |                   | 16.8±0.62      | 17.0±0.79                | 17.2±0.32                |
| <b>WBC</b> ( $10^9 \cdot L^{-1}$ )    |                   | 6.58±0.96      | 6.21±1.21**              | 6.10±1.70**              |
| <b>LY</b> (%)                         |                   | 48.4±4.96      | 48.7±0.19                | 50.7±5.54*               |
| <b>NE</b> (%)                         |                   | 34.9±4.07      | 35.1±3.39                | 32.1±7.82*               |
| <b>MO</b> (%)                         |                   | 16.0±1.54      | 15.8±3.48**              | 15.6±2.73**              |
| <b>EOS</b> (%)                        |                   | 0.45±0.45      | 0.27±0.41                | 0.20±0.14                |
| <b>BASO</b> (%)                       |                   | 0.14±0.09      | 0.12±0.02                | 0.11±0.01                |
| <b>PL</b> ( $10^9 \cdot L^{-1}$ )     |                   | 1337.8±204.9   | 1371.4±229.7             | 1406.0±40.7              |
| <b>MPV</b> (fL)                       |                   | 5.24±0.29      | 5.26±0.15                | 5.25±0.07                |
| <b>Female</b>                         |                   |                |                          |                          |
| <b>RBC</b> ( $10^{12} \cdot L^{-1}$ ) |                   | 10.9±0.44      | 10.5±0.29                | 10.5±0.10                |
| <b>Hb</b> (g/L)                       |                   | 160.2±8.14**   | 147.0±4.53**             | 147.0±1.41               |
| <b>HCT</b> (%)                        |                   | 63.4±4.74      | 64.4±1.36                | 64.8±3.42                |
| <b>MCV</b> (fL)                       |                   | 62.4±1.74      | 62.9±1.40                | 64.2±0.07                |
| <b>MCH</b> (Pg)                       |                   | 14.4±0.51      | 14.2±0.51                | 14.2±0.47                |
| <b>MCHC</b> (g/L)                     |                   | 231.4±3.21     | 230.4±4.28               | 228.8±6.60               |
| <b>RDW</b> (%)                        |                   | 16.9±0.71      | 16.7±0.54                | 17.0±1.00                |
| <b>WBC</b> ( $10^9 \cdot L^{-1}$ )    |                   | 7.15±1.08      | 5.36±0.87**              | 4.59±0.59***             |
| <b>LY</b> (%)                         |                   | 46.7±7.27      | 49.9±1.21                | 56.0±4.88*               |
| <b>NE</b> (%)                         |                   | 37.1±4.88      | 35.5±1.98                | 28.30±0.88               |
| <b>MO</b> (%)                         |                   | 21.5±3.17      | 14.8±1.12**              | 13.2±0.71**              |
| <b>EOS</b> (%)                        |                   | 0.56±0.46      | 0.56±0.85                | 0.52±0.45                |
| <b>BASO</b> (%)                       |                   | 0.14±0.02      | 0.13±0.12                | 0.09±0.07                |
| <b>PL</b> ( $10^9 \cdot L^{-1}$ )     |                   | 1188.6±232.7   | 1219.7±166.8             | 1248.5±316.1             |
| <b>MPV</b> (fL)                       |                   | 5.16±0.15      | 5.17±0.15                | 5.20±0.10                |

Data are expressed as the means ± S.E.M. \* $p < 0.05$ , \*\* $p < 0.01$ , \*\*\* $p < 0.001$ , compared with

the normal group.

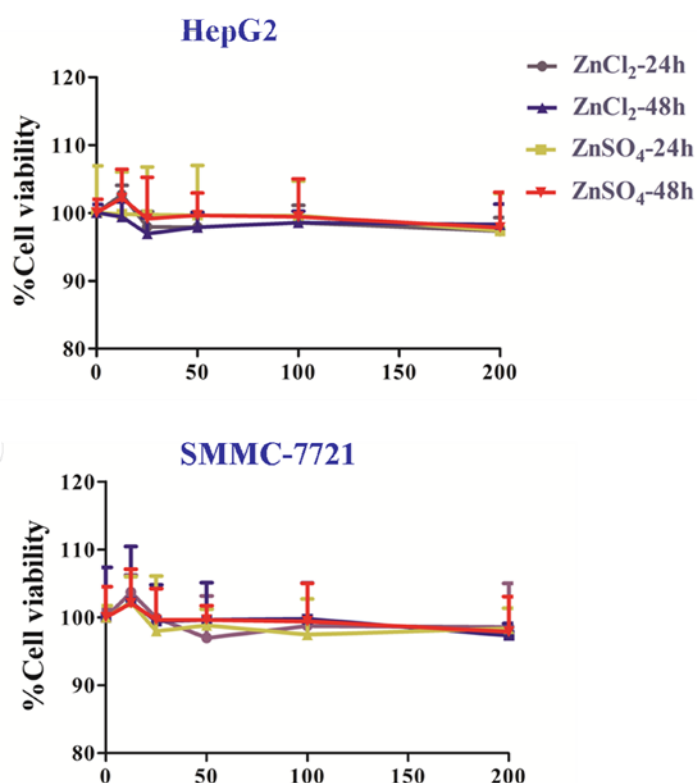

**Figure. S8.** Zinc ion affects the proliferation of hepatoma cell lines. (a and b) HepG2 and SMMC-7721 cells were incubated with various concentrations of ZnCl<sub>2</sub> or ZnSO<sub>4</sub> for 24 or 48h, respectively. The results are presented as the means  $\pm$  S.E.M.

**Table S7.** The comparison of anti-proliferation activity between complex (1) and the marketed platinum-based drugs on hepatoma cells.

|               | Hepatoma cell lines | IC50 ( $\mu$ M)   |                  |                  | Refs  |
|---------------|---------------------|-------------------|------------------|------------------|-------|
|               |                     | 24h               | 48h              | 72h              |       |
| Complex (1)   | HepG2               | 24.95 $\pm$ 1.54  | 10.01 $\pm$ 1.08 | ND <sup>a</sup>  | -     |
|               | SMMC-7721           | 29.52 $\pm$ 0.74  | 11.75 $\pm$ 1.75 | ND               | -     |
| Cisplatin     | HepG2               | ND                | 3.67 $\pm$ 0.80  | 1.06 $\pm$ 0.26  | [32a] |
|               | Hep3B               | ND                | 4.97 $\pm$ 0.86  | 2.13 $\pm$ 0.37  | [32a] |
|               | BEL-7404            | 62.0 $\pm$ 11.4   | 11.1 $\pm$ 0.6   | 9.5 $\pm$ 0.5    | [32b] |
| Carboplatin   | HepG2               | ND                | ND               | 61.30 $\pm$ 6.33 | [32c] |
|               | BEL-7402            | ND                | ND               | 41.69 $\pm$ 4.32 | [32c] |
|               | BEL-7404            | 505.6 $\pm$ 108.3 | 190.8 $\pm$ 17.8 | 180.2 $\pm$ 18.2 | [32b] |
| Oxaliplatin   | HepG2               | 129.2 $\pm$ 1.02  | 12.10 $\pm$ 5.03 | 8.21 $\pm$ 6.12  | [32d] |
|               | BEL-7404            | 92.2 $\pm$ 15.9   | 24.7 $\pm$ 3.3   | 22.4 $\pm$ 2.0   | [32b] |
| Dicycloplatin | HepG2               | ND                | ND               | 48.01 $\pm$ 2.45 | [32c] |
|               | BEL-7402            | ND                | ND               | 30.27 $\pm$ 3.18 | [32c] |

a: ND means not detected

**Table S8.** The comparison of acute toxicity between complex (1) and the marketed platinum-based drugs on mice.

|             | Administration methods   | Animal           | LD50 (mg/kg) | Refs  |
|-------------|--------------------------|------------------|--------------|-------|
| Complex (1) | <i>i.g.</i> <sup>a</sup> | ICR mice         | 736          | -     |
| Cisplatin   | <i>i.p.</i> <sup>b</sup> | CD-I albino mice | 17           | [38a] |
| Carboplatin | <i>i.p.</i>              | ICR mice         | 150          | [38b] |
| Oxaliplatin | <i>i.p.</i>              | ICR mice         | 19.8         | [38b] |

a: *i.g.* means intragastrically administered; b: *i.p.* means intraperitoneally injection.
